# Supplementary material for: Consumption of Tritordeum Bread Reduces Immunogenic Gluten Intake without Altering the Gut Microbiota
Source: Foods. 2022 May 16;11(10):1439. doi: 10.3390/foods11101439 (PMC9142130; doi:10.3390/foods11101439)
Supplement: Supplementary file 1 [file foods-11-01439-s001.zip › Table S1_ list epitopes_def.xlsx]

## Sheet: Hoja1
Table S1. Epitope names and sequences of CD-epitopes, p31-43, moAb recognition sites and IgE binding sites. References in which each one is described are also listed in the table. moAb: monoclonal antibody.
Type	Epitope name	Peptide sequence	Ref
CD epitopes	DQ2.5_glia_α1a	PFPQPQLPY	[10]
	DQ2.5_glia_α1b	PYPQPQLPY
	DQ2.5_glia_α2	PQPQLPYPQ
	DQ2.5_glia_α3	FRPQQPYPQ
	DQ2.5_glia_γ1	PQQSFPQQQ
	DQ2.5_glia_γ2	IQPQQPAQL
	DQ2.5_glia_γ2a	FPQQPQQPF
	DQ2.5_glia_γ2b	YPQQPQQPF
	DQ2.5_glia_γ3	QQPQQPYPQ
	DQ2.5_glia_γ4a	SQPQQQFPQ
	DQ2.5_glia_γ4b	PQPQQQFPQ
	DQ2.5_glia_γ4c	QQPQQPFPQ
	DQ2.5_glia_γ4d	PQPQQPFCQ
	DQ2.5_glia_γ4e	LQPQQPFPQ
	DQ2.5_glia_γ5	QQPFPQQPQ
	DQ2.5_glia_ω1	PFPQPQQPF
	DQ2.5_glia_ω2	PQPQQPFPW
	DQ2.5_glut_L1	PFSQQQQPV
	DQ2.5_glut_L2	FSQQQQSPF
	DQ2.5_hor_1	PFPQPQQPF
	DQ2.5_hor_2	PQPQQPFPQ
	DQ2.5_hor_3a	PIPQQPQPY
	DQ2.5_hor_3b	PYPQQPQPY
	DQ2.5_sec_1	PFPQPQQPF
	DQ2.5_sec_2	PQPQQPFPQ
	DQ2.5_sec_3	PFPQQPFQI
	DQ2.5_ave_1a	PYPEQQEPF
	DQ2.5_ave_1b	PYPEQQQPF
	DQ2.5_ave_1c	PYPEQQQPI
	DQ2.2_glut_L1	PFSQQQQPV
	DQ2.2_glia_α1	QGSVQPQQL
	DQ2.2_glia_α2	QYSQPQQPI
	DQ8_glia_α1	QGSFQPSQQ
	DQ8_glia_γ1a	QQPQQPFPQ
	DQ8_glia_γ1b	QQPQQPYPQ
	DQ8_glia_γ2	PQQSFPQQQ
	DQ8_glut_H1	QGYYPTSPQ
	DQ8.5_glia_α1	QGSFQPSQQ
	DQ8.5_glia_γ1	PQQSFPQQQ
	DQ8.5_glut_H1	QGYYPTSPQ
p31-43	p31-43	LGQQQPFPPQQPY	[42]
moAb recognition sites	G12_1	QPQLPY	[45]
	G12_2	QPQLPF
	G12_3	QPQLPL
	G12_4	QPQQPY
	A1_1	QLPFPQP	[45]
	A1_2	QQPFPQP
	A1_3	QLPYPQP
	A1_4	QQPYPQP
	A1_5	QQPYPQE
	R5_1	QQPFP	[43]
	R5_2	QQQFP
	R5_3	LQPFP
	R5_4	QLPFP
IgE-binding sites	IgE_ω5_1	QQIPQQQ	[48]
	IgE_ω5_2	QQFPQQQ
	IgE_ω5_3	QQSPEQQ
	IgE_ω5_4	QQSPQQQ
	IgE_ω5_5	QQLPQQQ
	IgE_ω5_6	QQYPQQQ
	IgE_ω5_7	PYPP
	IgE_ω5_8	QQFHQQQ
	IgE_ω5_9	QSPEQQQ
	IgE_ω5_10	YQQYPQQ
	IgE_ω5_11	QQPPQQ
	IgE_ω5_12	QQQLPQQQ
	IgE_ω5_13	QQQFPQQQ
	IgE_HMW_1	QQPGQ
	IgE_HMW_2	QQPGQGQQ
	IgE_HMW_3	QQSGQGQ
	IgE_α_1	VRVPVPQLQP
	IgE_α_2	QEQVPLVQQQ
	IgE_α_3	VQQQQFPGQQ
	IgE_α_4	QQQFPGQQQQ
	IgE_α_5	YLQLQPFPQP
	IgE_α_6	QILQQILQQQ
	IgE_α_7	LQIPEQSQCQ
	IgE_α_8	QEQKQQLQQQ
	IgE_α_9	SFQQPQQQYP
	IgE_α_10	LALQTLPAMC
	IgE_α_11	YIPPHCSTTI
	IgE_γ_1	QPQQPFPQ
	IgE_ω12_1	QPQQPFPQ
	IgE_LMW_1	HQQQPIQQQP
	IgE_LMW_2	QQPIQQQPQQ
	IgE_LMW_3	QQFPQQQPCS
	IgE_LMW_4	PFVHPSILQQ
	IgE_LMW_5	QCSPVAMPQS
	IgE_LMW_6	LPQIPQQSRY
	IgE_LMW_7	QSRYEAIRAI
	IgE_LMW_8	QQQPP
