# Supplementary material for: Consumption of Tritordeum Bread Reduces Immunogenic Gluten Intake without Altering the Gut Microbiota
Source: Foods. 2022 May 16;11(10):1439. doi: 10.3390/foods11101439 (PMC9142130; doi:10.3390/foods11101439)
Supplement: Supplementary file 1 [file foods-11-01439-s001.zip › Table_S2 moAb.xlsx]

## Sheet: Hoja1
Table S2. Presence of each moAb recognition site in wheat and Tritordeum after chymotrypsin and trypsin digestion (left) and CD canonical epitopes, p31-43 peptide and the 33-mer peptide (right). Sequences found in any of these latter epitopes are shown in bold letters. moAb: monoclonal antibody.
		Chymotrypsin		Trypsin
moAb	Seq	Wheat	Tritordeum	Wheat	Tritordeum	Presence in CD canonical epitopes	Presence in p31-43	Presence in 33mer peptide
G12_1	QPQLPY	22	4	0	0	3	0	3
G12_2	QPQLPF	0	0	0	0	0	0	0
G12_3	QPQLPL	0	0	0	0	0	0	0
G12_4	QPQQPY	0	0	3	1	2	0	0
A1_1	QLPFPQP	0	0	0	0	0	0	0
A1_2	QQPFPQP	0	0	1	0	0	0	0
A1_3	QLPYPQP	20	3	0	0	0	0	3
A1_4	QQPYPQP	11	5	0	1	0	0	0
A1_5	QQPYPQE	0	0	0	0	0	0	0
R5_1	QQPFP	10	3	8	2	7	1	0
R5_2	QQQFP	7	2	0	0	2	0	0
R5_3	LQPFP	10	3	0	0	0	0	1
R5_4	QLPFP	0	0	0	0	0	0	0
